# Supplementary material
Source: MDPI journal article supplement (https://www.mdpi.com/2037-0164/14/2/35)
Supplement: s1 [file s1 › ijpb-2388311-supplementary.pdf]

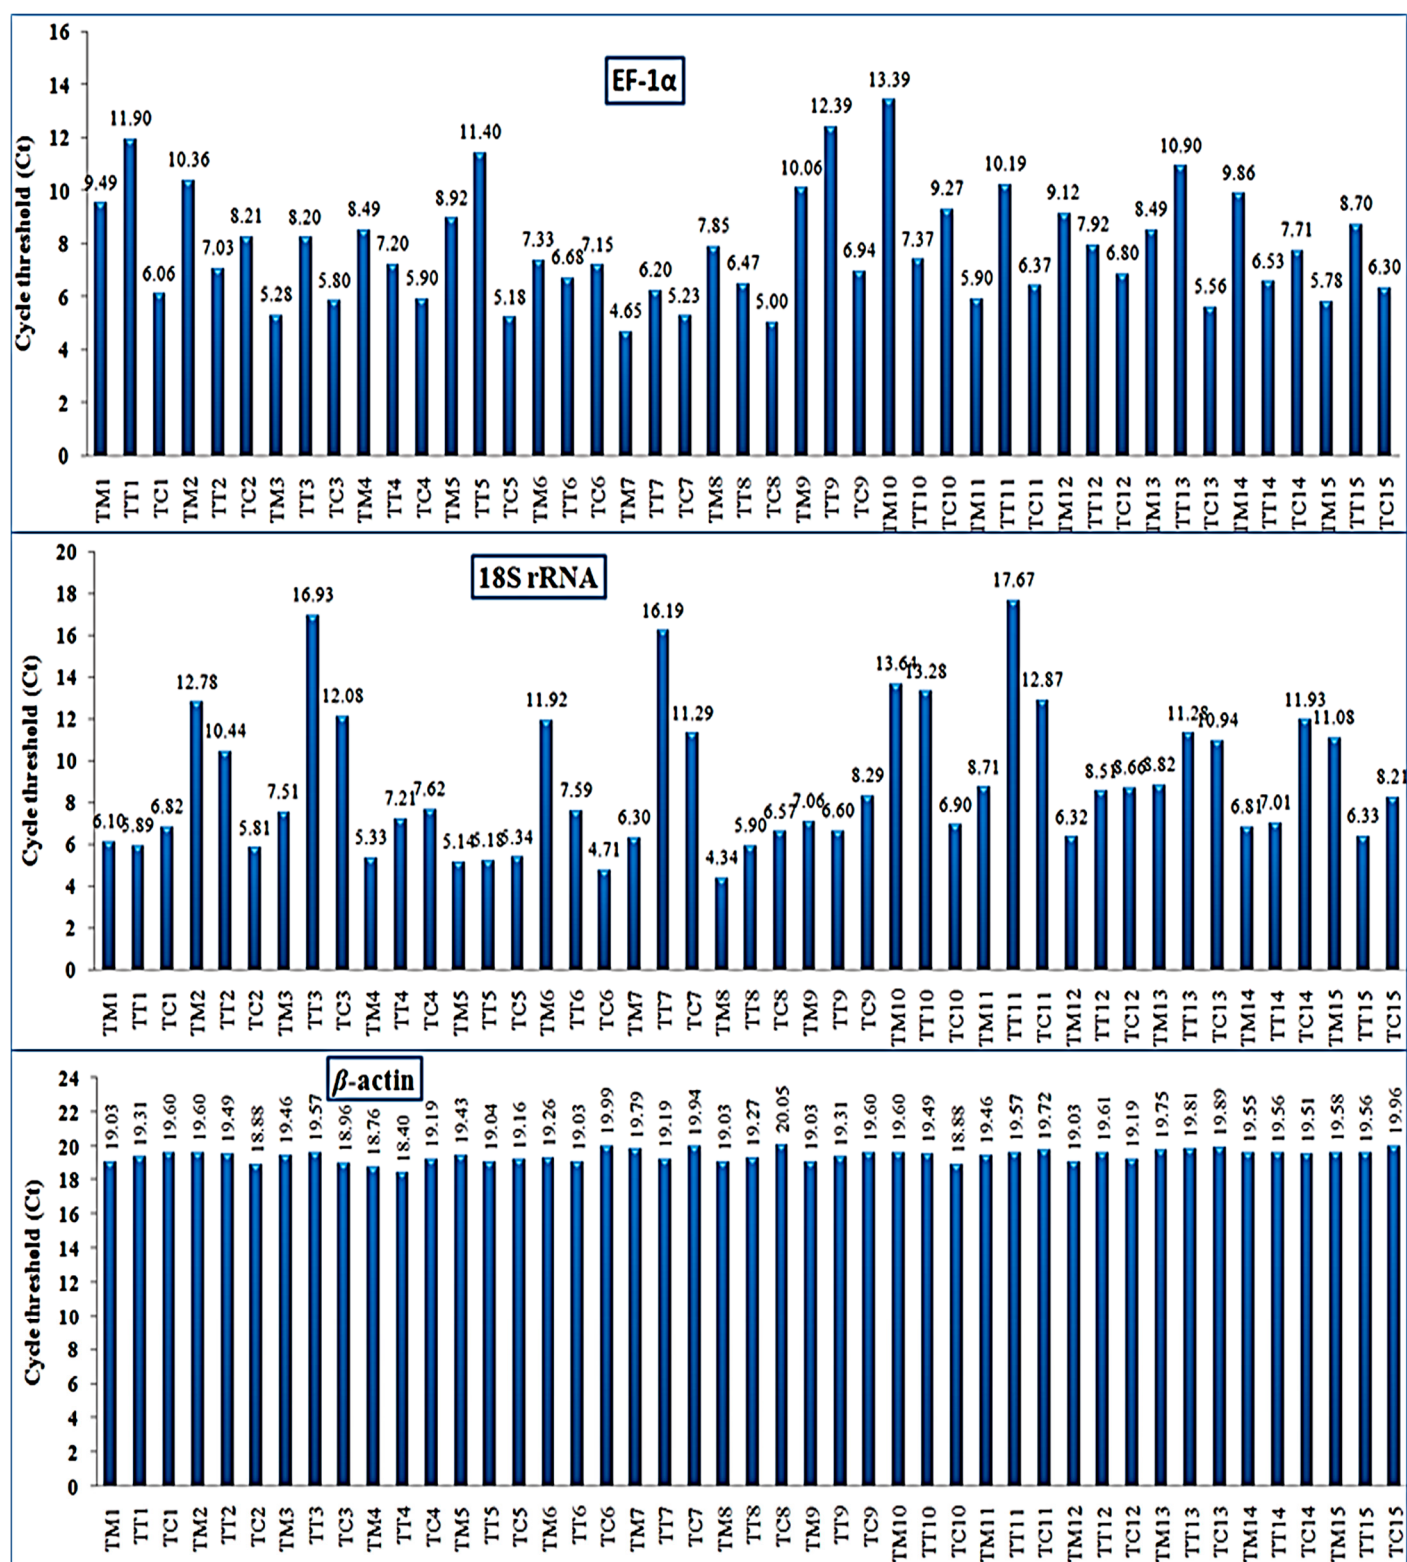

Figure S1. The cycle threshold (Ct) for all samples with the three housekeeping genes (*EF-1α*, *18S rRNA*, and *β-actin*).
